# Supplementary material for: Design of novel small molecule base-pair recognizers of toxic CUG RNA transcripts characteristics of DM1
Source: PubMed Central journal article supplement — Comput Struct Biotechnol J. 2020 Dec 6;19:51–61. doi: 10.1016/j.csbj.2020.11.053 (PMC7753043; doi:10.1016/j.csbj.2020.11.053), 2020-12-06
Supplement: mmc1.pdf [file mmc1.pdf]

## Supplementary materials

### **Design of novel small molecule base-pair recognizers of toxic CUG RNA transcripts characteristics of DM1**

R. Ondono<sup>1†</sup>, Á. Lirio<sup>1†</sup>, C. Elvira<sup>1</sup>, E. Álvarez-Marimon<sup>2</sup>, C. Provenzano<sup>3</sup>, B. Cardinali<sup>3</sup>, M. Pérez-Alonso<sup>4,5</sup>, A. Perálvarez-Marín<sup>2</sup>, J. I. Borrell<sup>1</sup>, G. Falcone<sup>3</sup>, R. Estrada-Tejedor<sup>1\*</sup>

<sup>1</sup> IQS School of Engineering, Universitat Ramon Llull, Barcelona, Spain

<sup>2</sup> Biophysics Unit, Department of Biochemistry and Molecular Biology, School of Medicine, Universitat Autònoma de Barcelona, Cerdanyola del Vallès, Spain

<sup>3</sup> Institute of Biochemistry and Cell Biology, National Research Council, Monterotondo, Rome, Italy

<sup>4</sup> Translational Genomics Group, Incliva Health Research Institute, Valencia, Spain

<sup>5</sup> Department of Genetics and Interdisciplinary Research Structure for Biotechnology and Biomedicine, University of Valencia, Valencia, Spain

† These authors contributed the same

\*Corresponding author

## Table of Contents

|                                                                                                                                      |    |
|--------------------------------------------------------------------------------------------------------------------------------------|----|
| Computer-aided molecular design.....                                                                                                 | 3  |
| Figure S1 .....                                                                                                                      | 3  |
| Figure S2.....                                                                                                                       | 6  |
| Figure S3.....                                                                                                                       | 8  |
| NMR Spectra .....                                                                                                                    | 9  |
| 2-(2,4-diamino-7-oxo-5,6,7,8-tetrahydropyrido[2,3- <i>d</i> ]pyrimidin-6-yl)acetic acid (5).....                                     | 10 |
| dimethyl 2-(2,2-dicyanoethyl)succinate (6).....                                                                                      | 11 |
| <i>N,N'</i> -(pentane-1,5-diyl)bis(2-(2,4-diamino-7-oxo-5,6,7,8-tetrahydropyrido[2,3- <i>d</i> ]pyrimidin-6-yl)acetamide) (1a) ..... | 12 |
| <i>N,N'</i> -(heptane-1,7-diyl)bis(2-(2,4-diamino-7-oxo-5,6,7,8-tetrahydropyrido[2,3- <i>d</i> ]pyrimidin-6-yl)acetamide) (1b) ..... | 13 |
| <i>N,N'</i> -(octane-1,8-diyl)bis(2-(2,4-diamino-7-oxo-5,6,7,8-tetrahydropyrido[2,3- <i>d</i> ]pyrimidin-6-yl)acetamide) (1c). ..... | 14 |
| <i>N,N'</i> -(nonane-1,9-diyl)bis(2-(2,4-diamino-7-oxo-5,6,7,8-tetrahydropyrido[2,3- <i>d</i> ]pyrimidin-6-yl)acetamide) (1d) .....  | 15 |
| <i>N,N'</i> -(decane-1,10-diyl)bis(2-(2,4-diamino-7-oxo-5,6,7,8-tetrahydropyrido[2,3- <i>d</i> ]pyrimidin-6-yl)acetamide) (1e).....  | 16 |
| Biochemistry.....                                                                                                                    | 17 |
| Figure S4.....                                                                                                                       | 17 |
| Cell Biology.....                                                                                                                    | 18 |
| Figure S5.....                                                                                                                       | 18 |
| Figure S6.....                                                                                                                       | 19 |
| Table S1 .....                                                                                                                       | 19 |
| Figure S7.....                                                                                                                       | 20 |
| Table S2 .....                                                                                                                       | 20 |

## Computer-aided molecular design

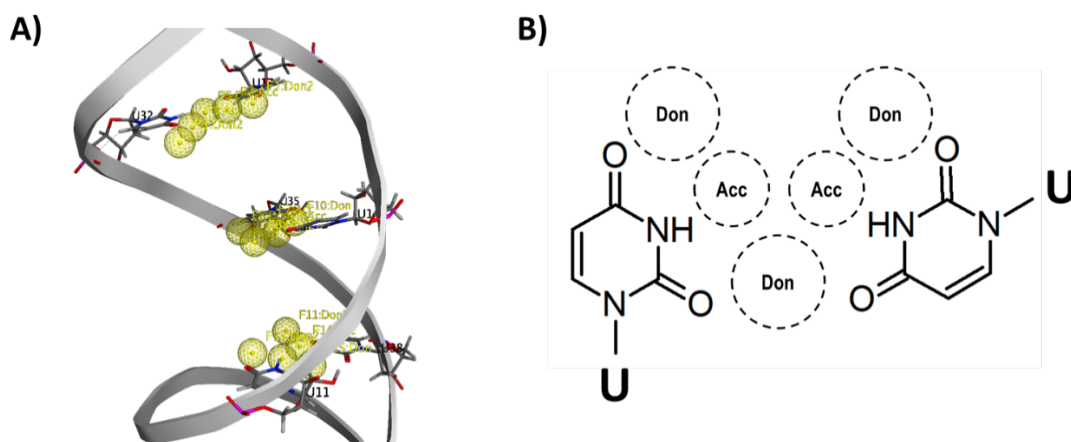

**Figure S1.** Graphical representation of the pharmacophore features within the RNA structure (A). Schematic view of the pharmacophore model generated for each U·U mismatch (B).

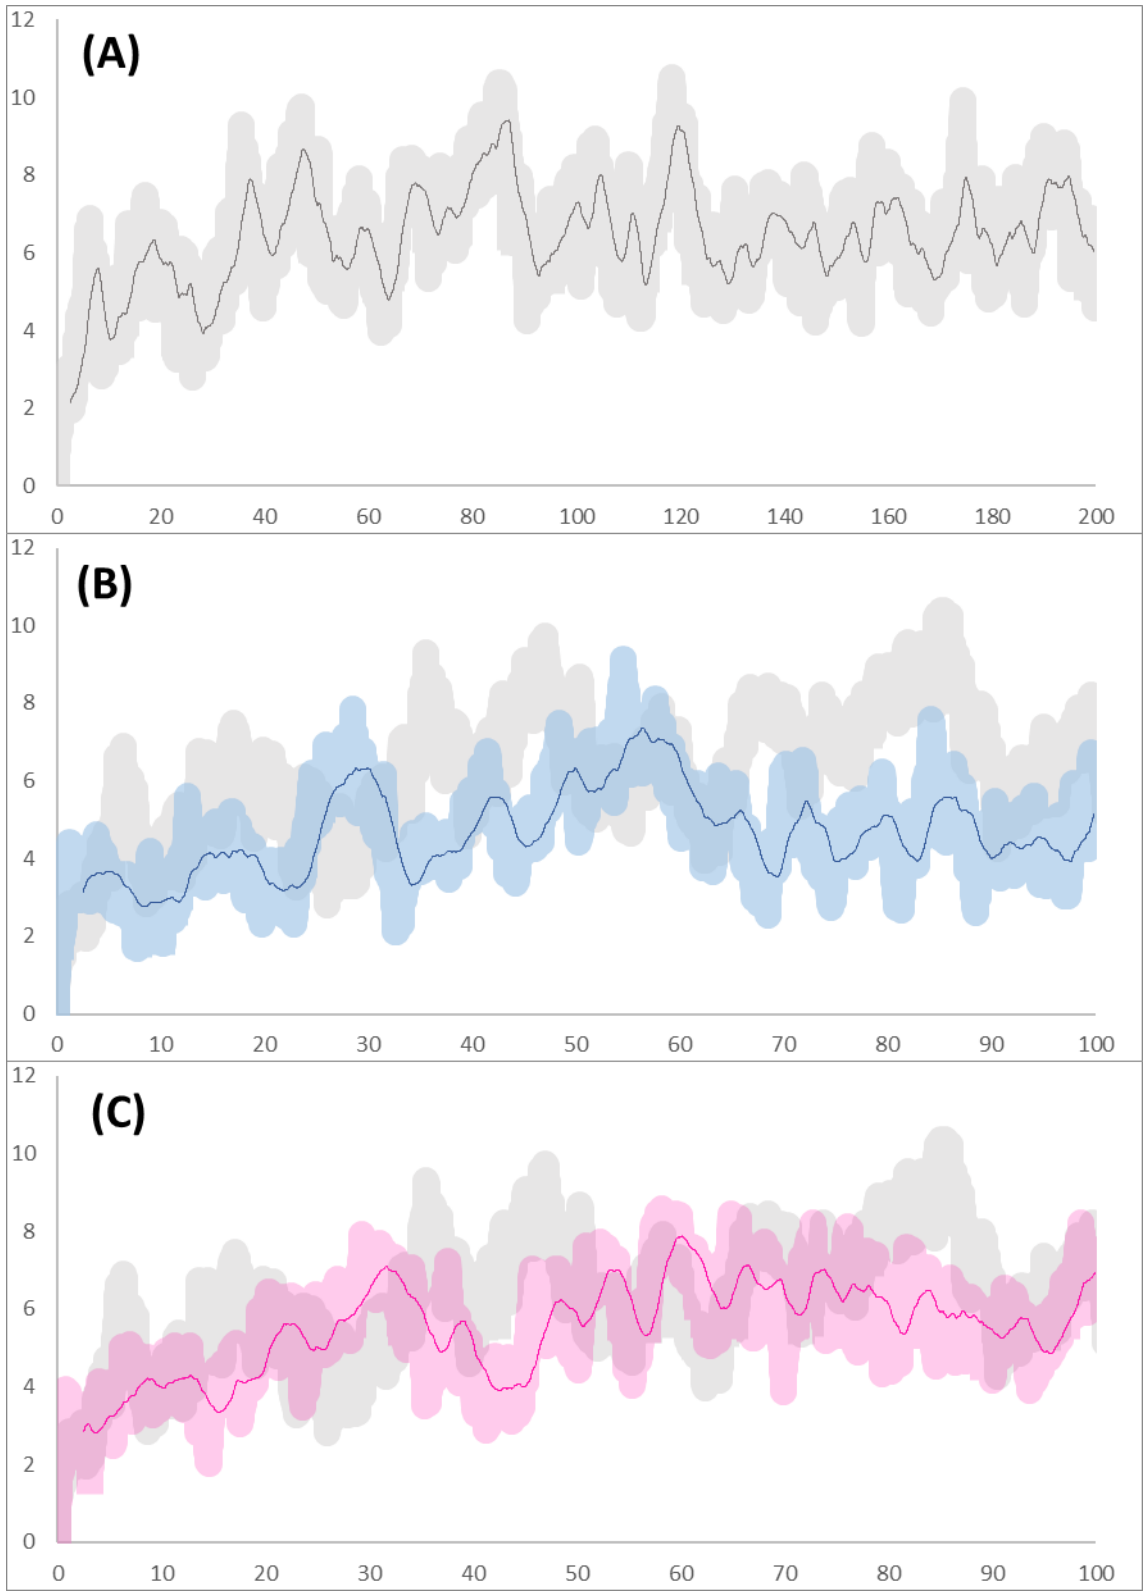

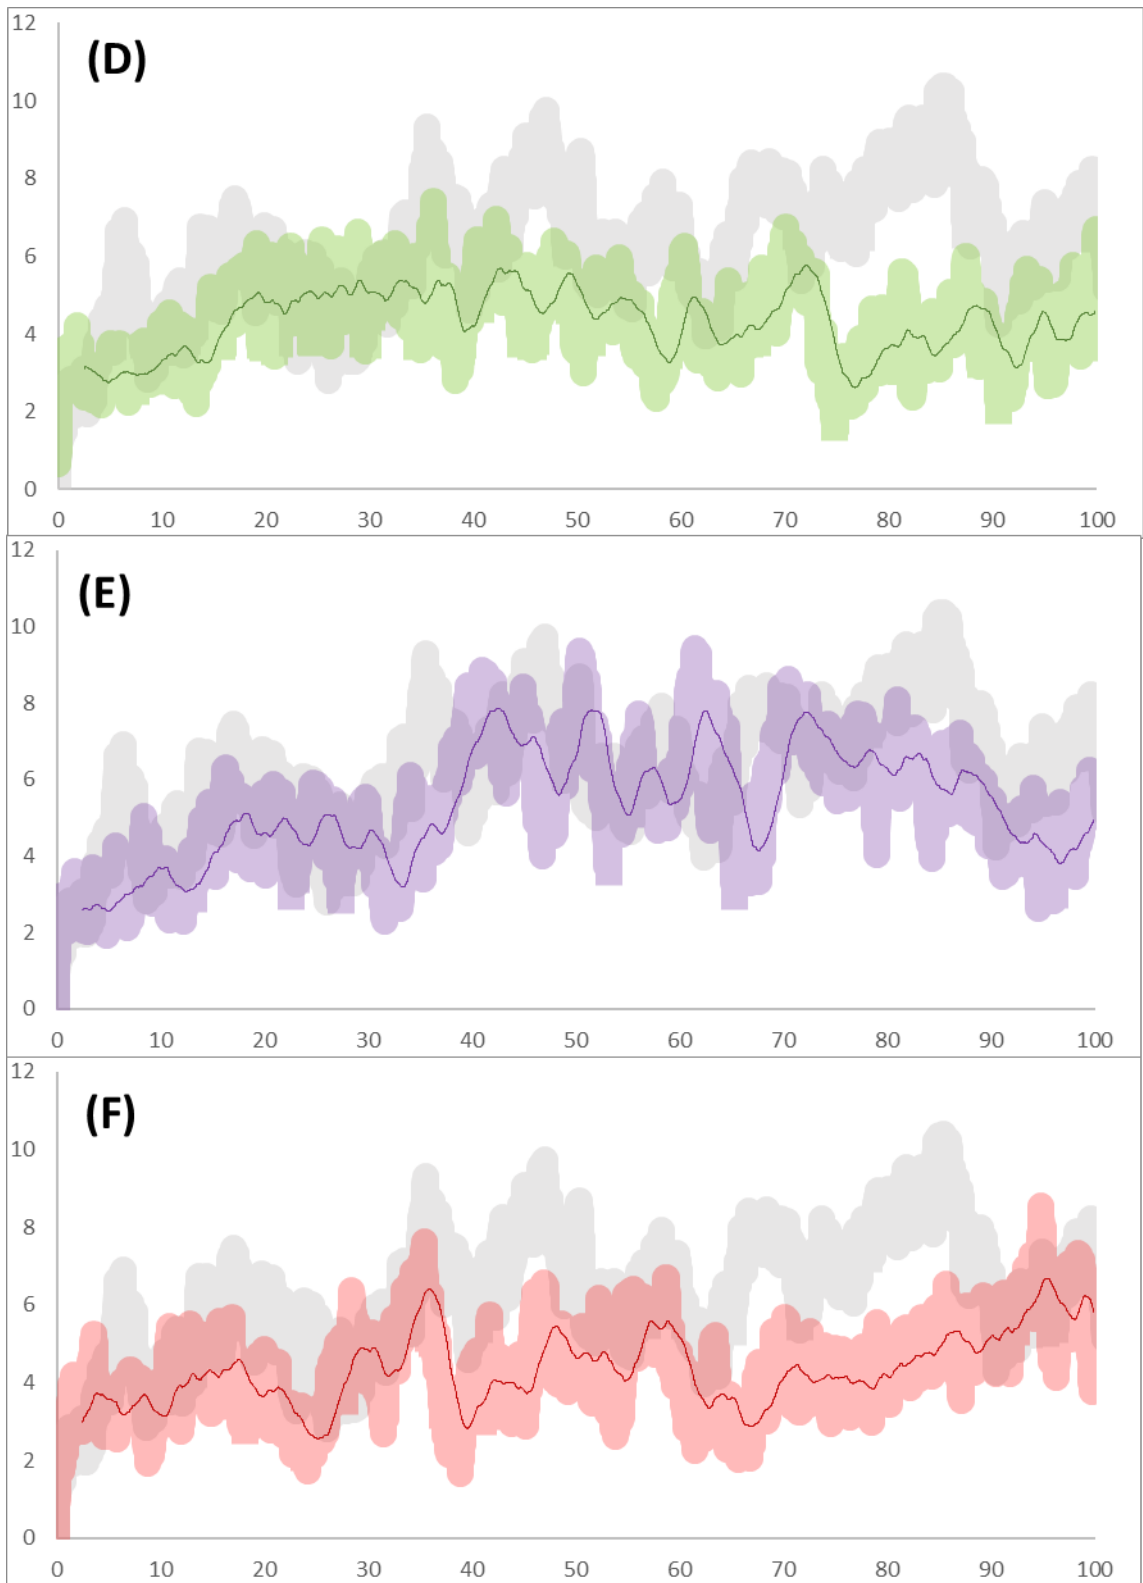

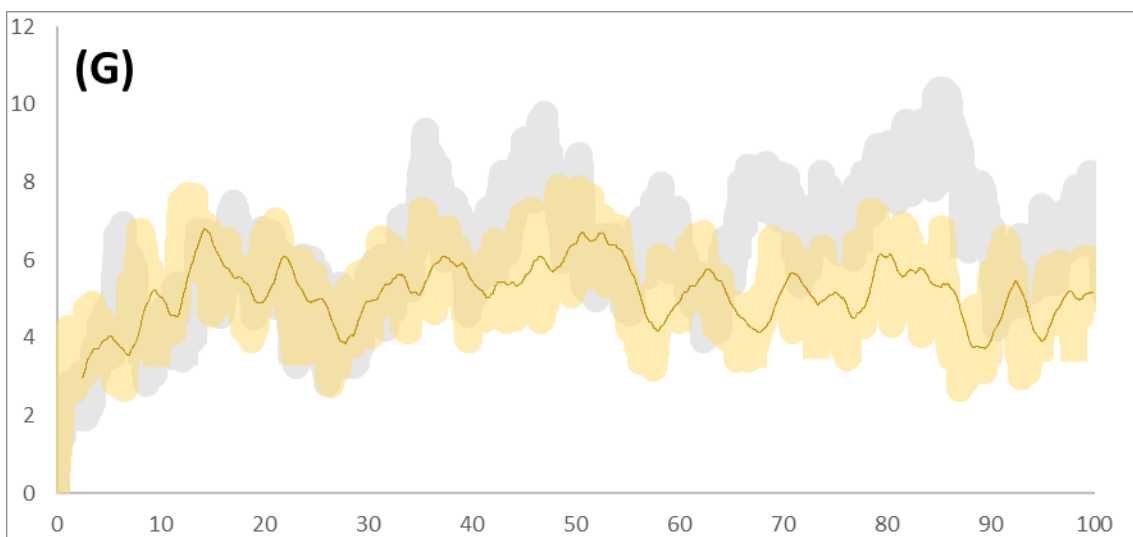

**Figure S2.** RMSD profile of the RNA structure along MD calculations performed considering the RNA structure only (A) and in complex with the compound of reference Z (B) and 1a-1e candidates (C-G). RMSD is represented in Armstrongs (Å) and the simulation time in ns.

**Blank:**

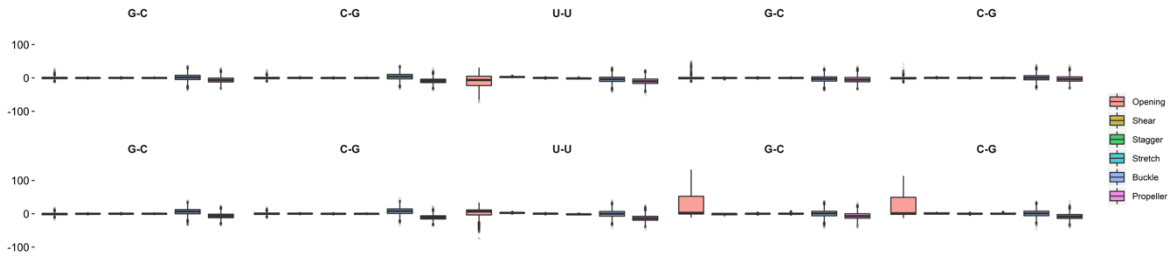

**Z:**

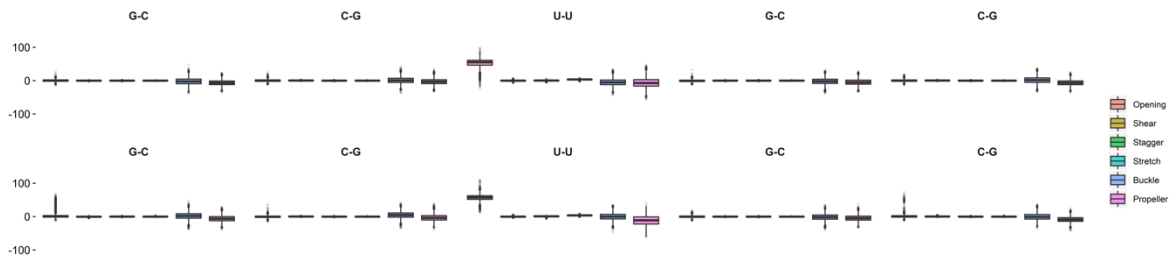

**1a:**

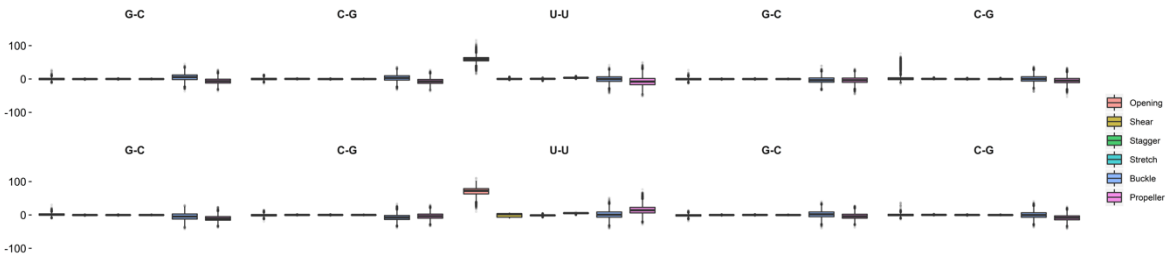

**1b:**

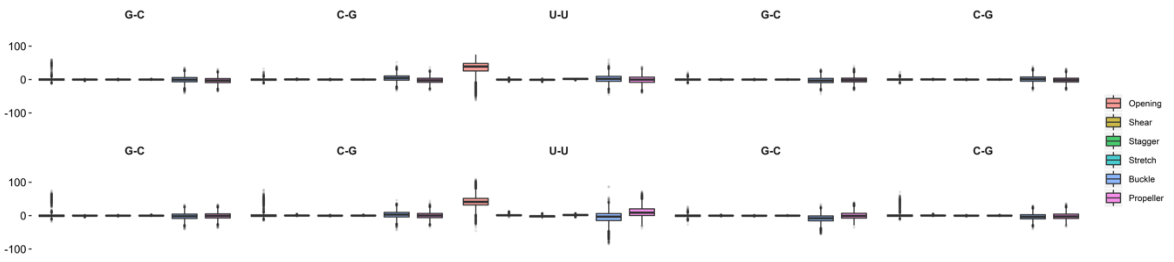

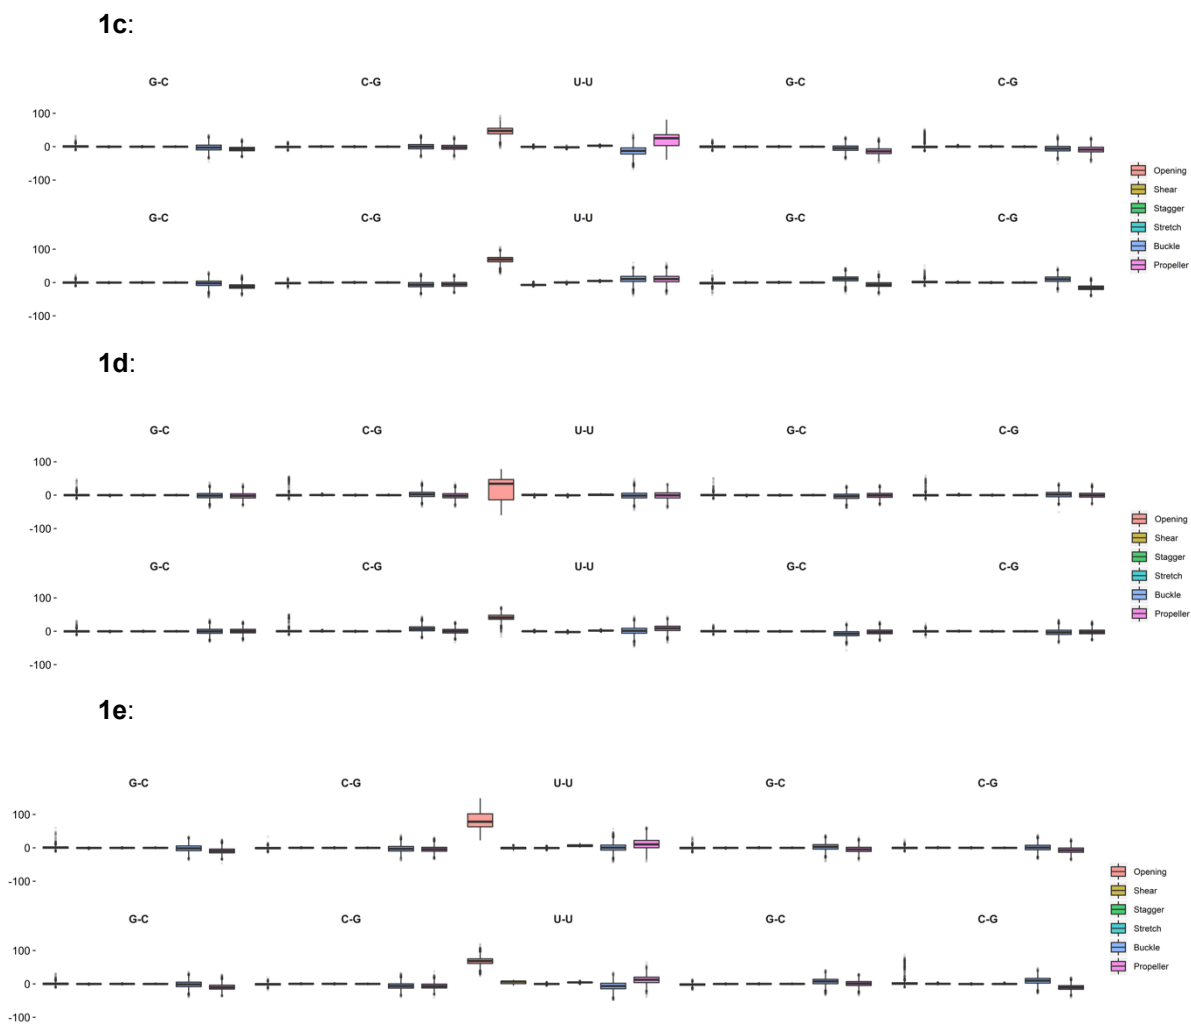

**Figure S3.** A) analysis of single base-pair structural parameters (Opening, Shear, Stagger, Stretch, Buckle, Propeller). Full-length MD is displayed in boxplot graph format.



# NMR Spectra

## methyl 2-(2,4-diamino-7-oxo-5,6,7,8-tetrahydropyrido[2,3-d]pyrimidin-6-yl)acetate (4)

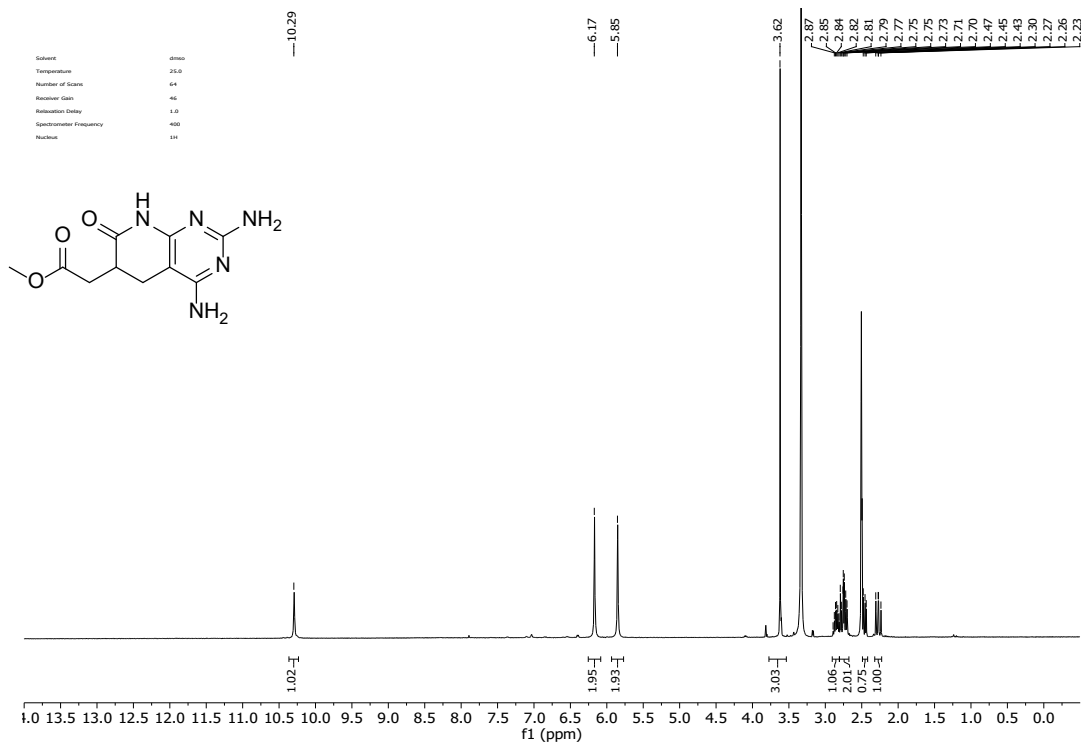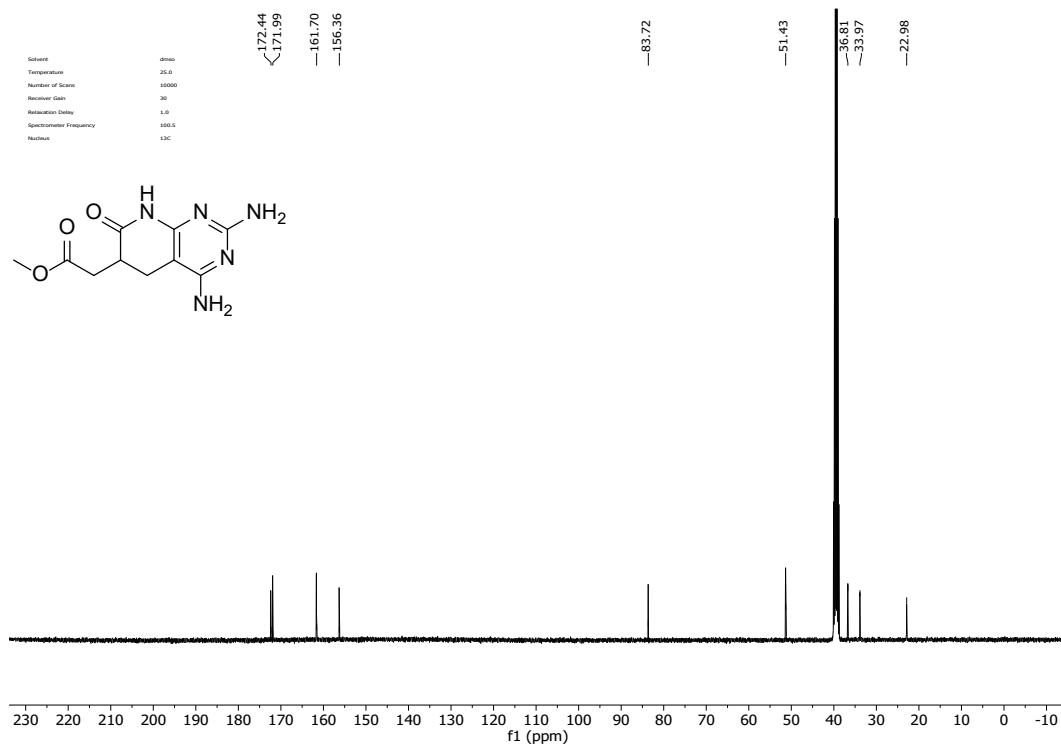

## 2-(2,4-diamino-7-oxo-5,6,7,8-tetrahydropyrido[2,3-d]pyrimidin-6-yl)acetic acid (5)

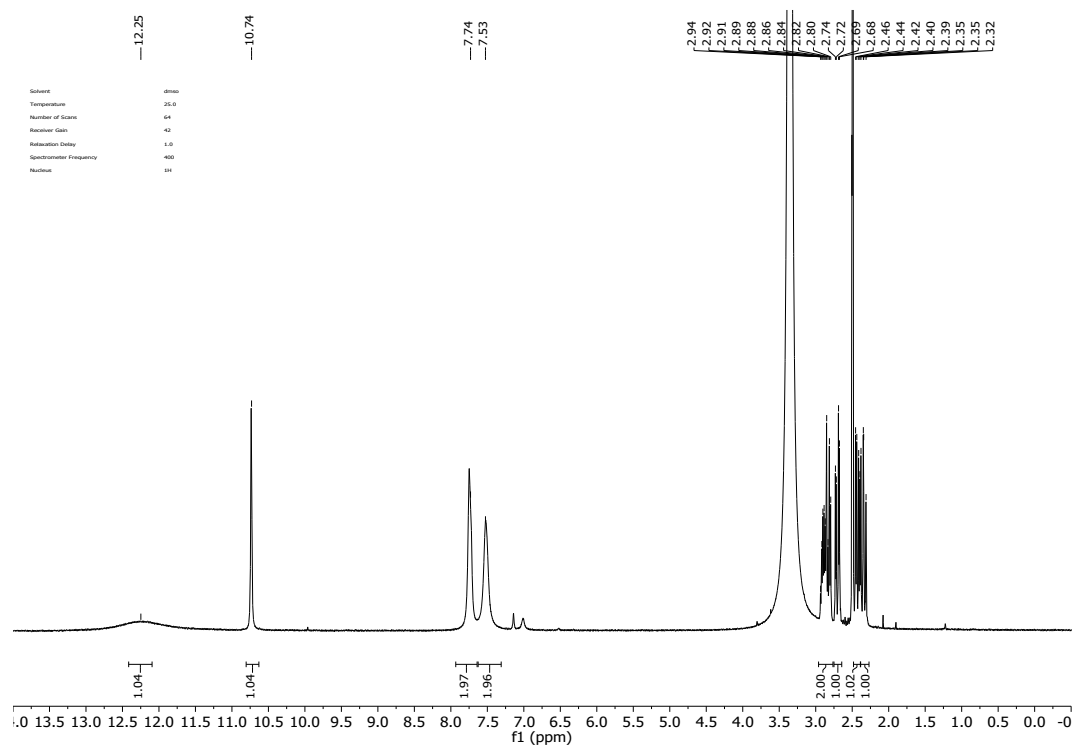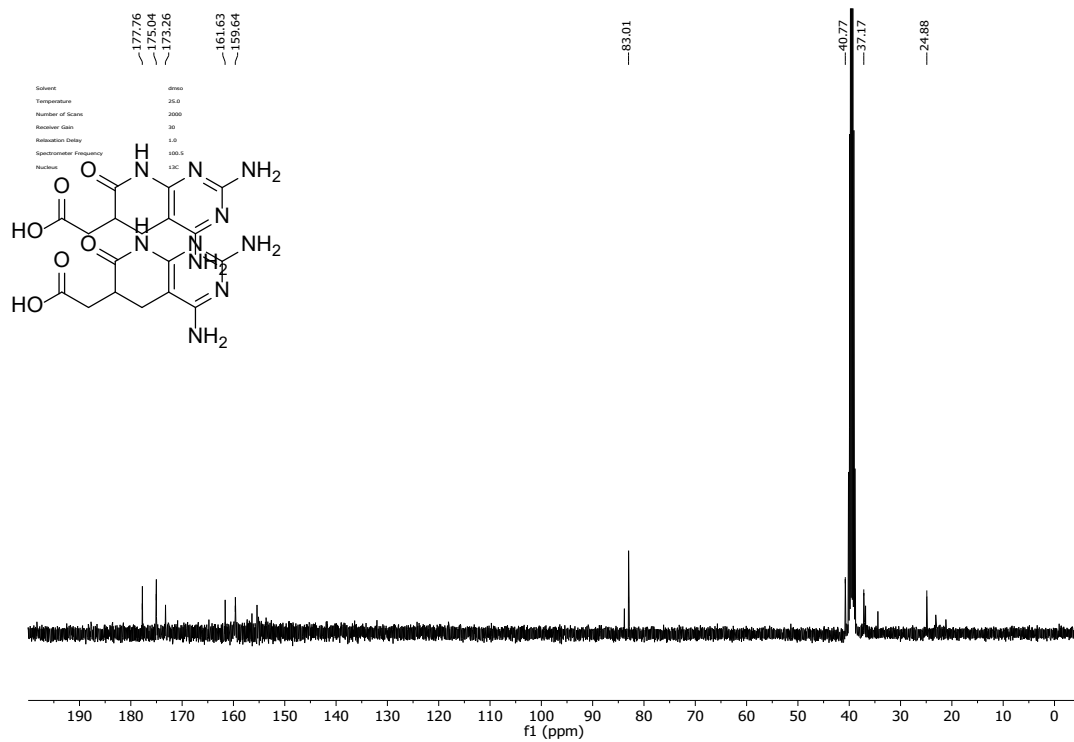

# dimethyl 2-(2,2-dicyanoethyl)succinate (6)

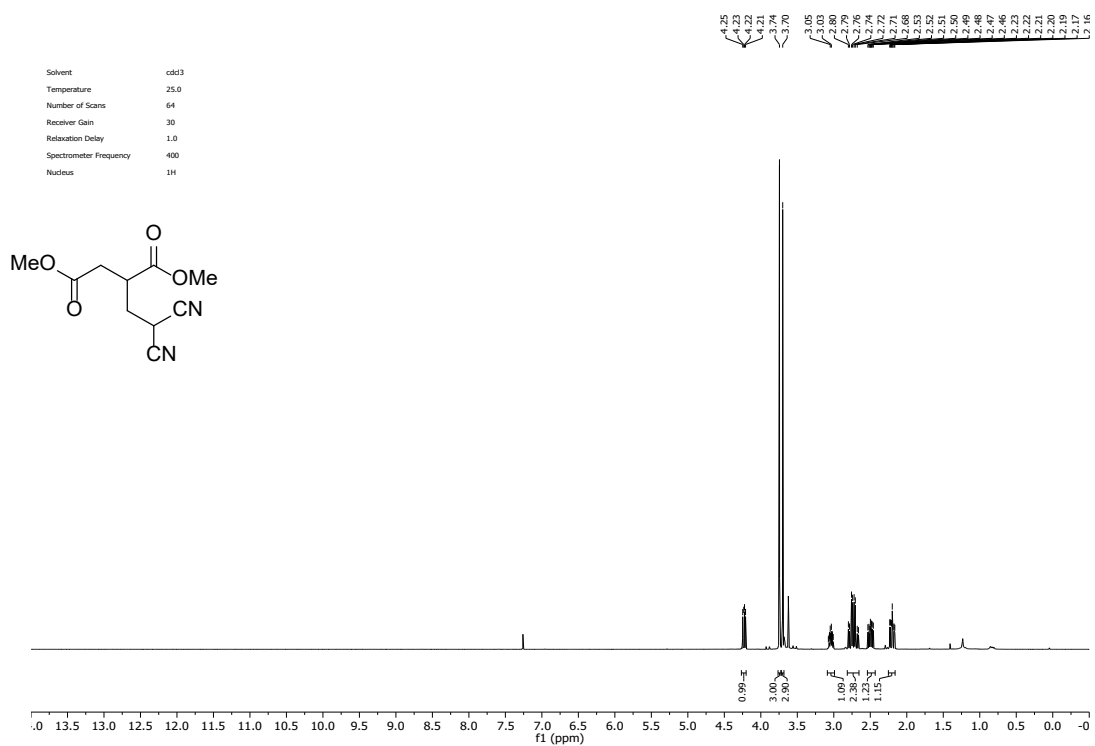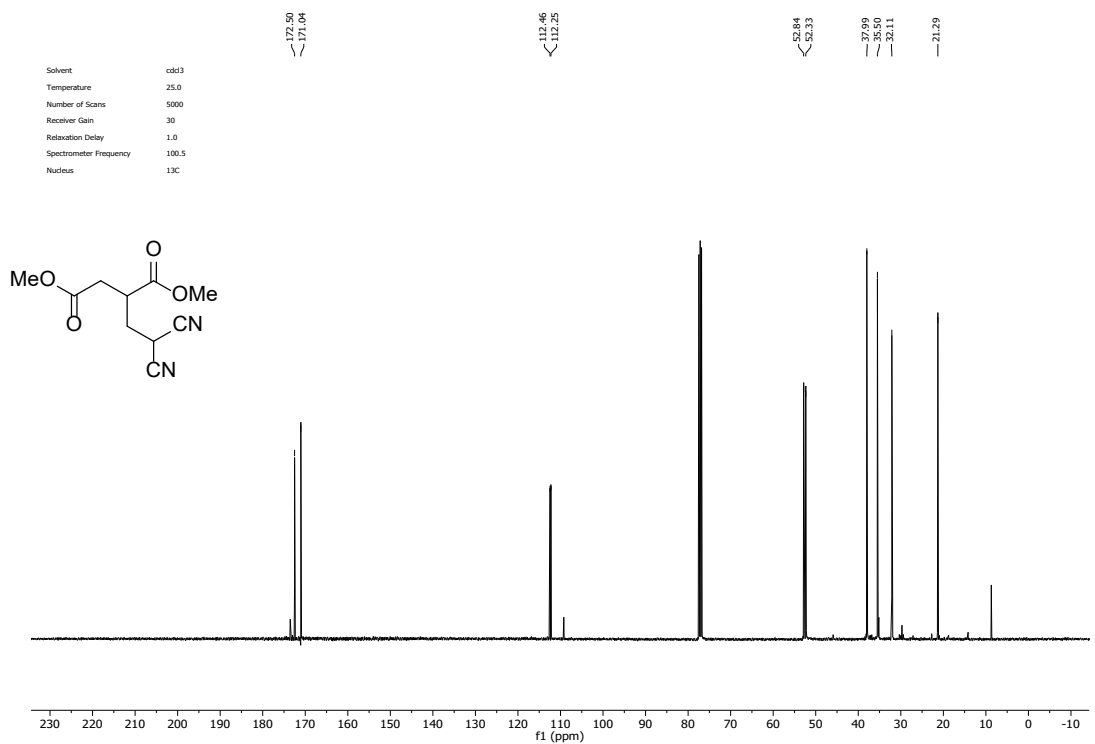

***N,N'*-(pentane-1,5-diyl)bis(2-(2,4-diamino-7-oxo-5,6,7,8-tetrahydropyrido[2,3-*d*]pyrimidin-6-yl)acetamide) (1a)**

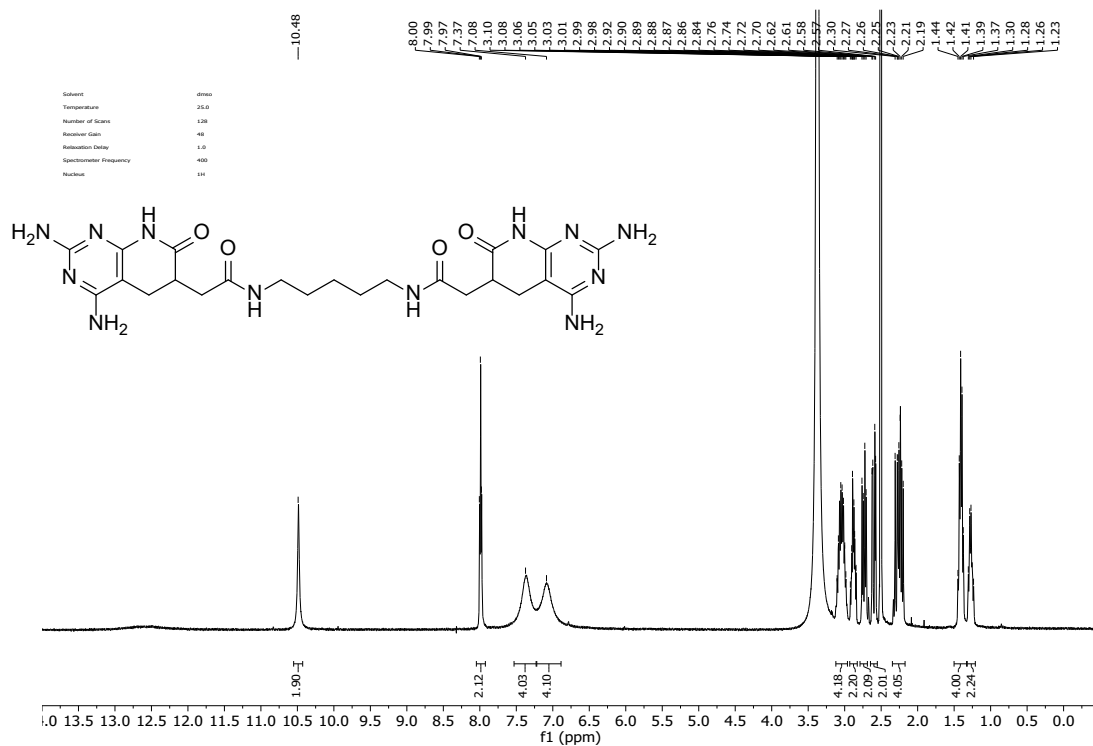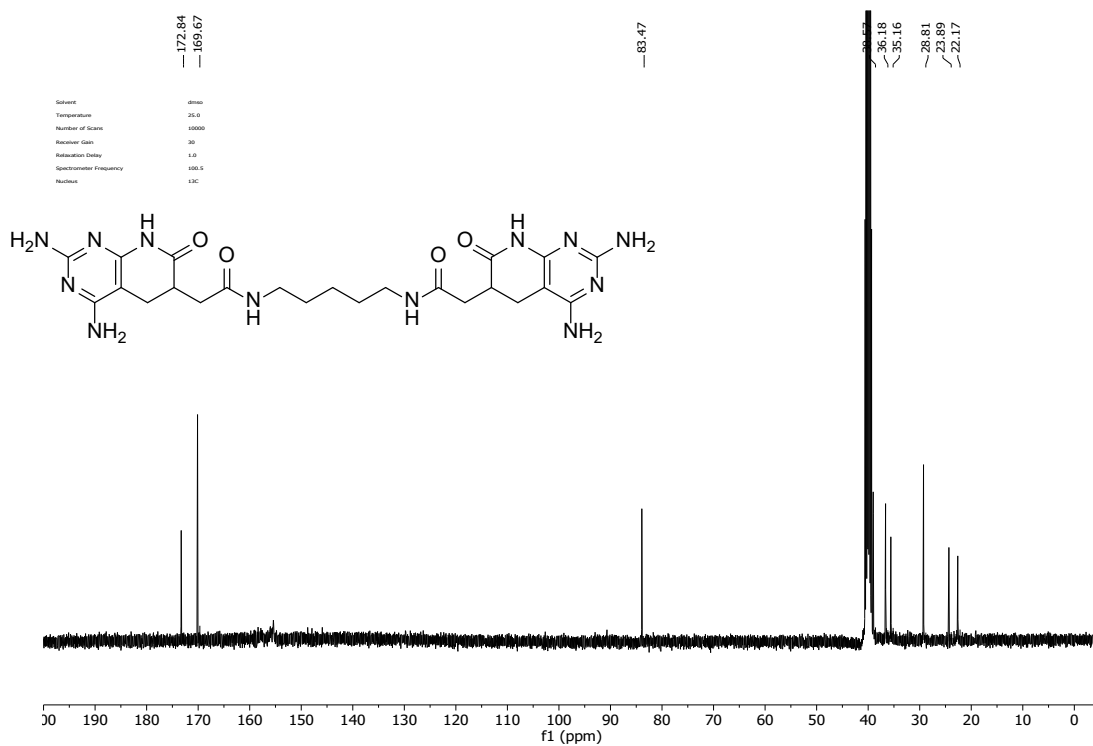

***N,N'*-(heptane-1,7-diyl)bis(2-(2,4-diamino-7-oxo-5,6,7,8-tetrahydropyrido[2,3-*d*]pyrimidin-6-yl)acetamide) (1b)**

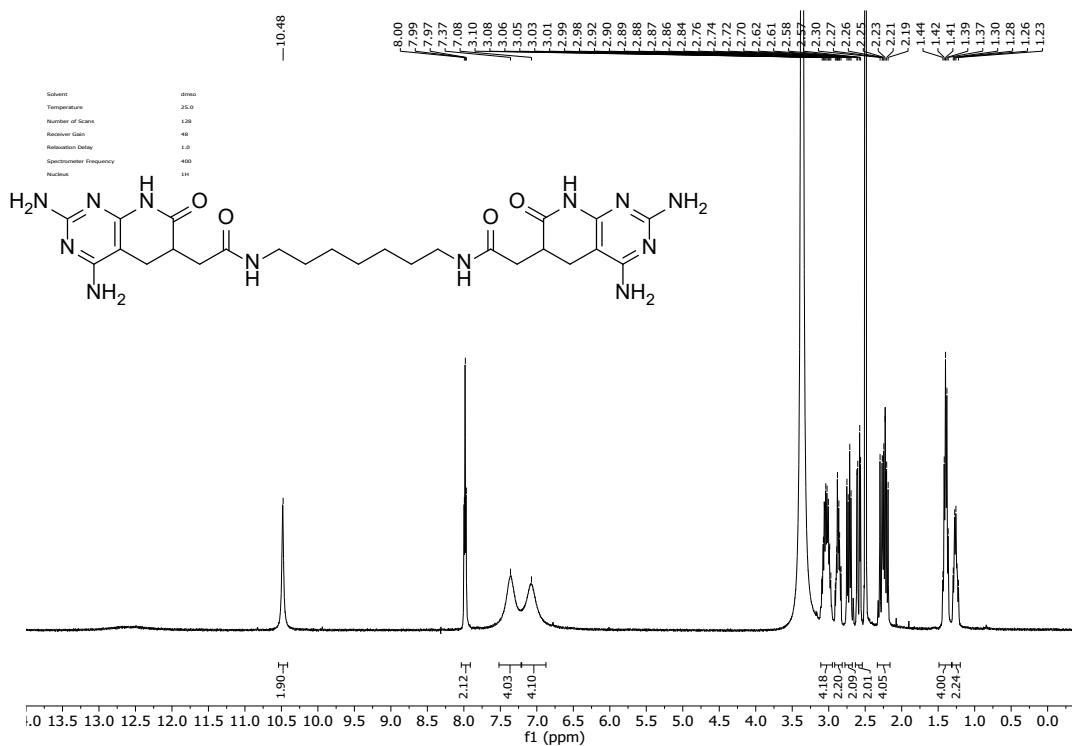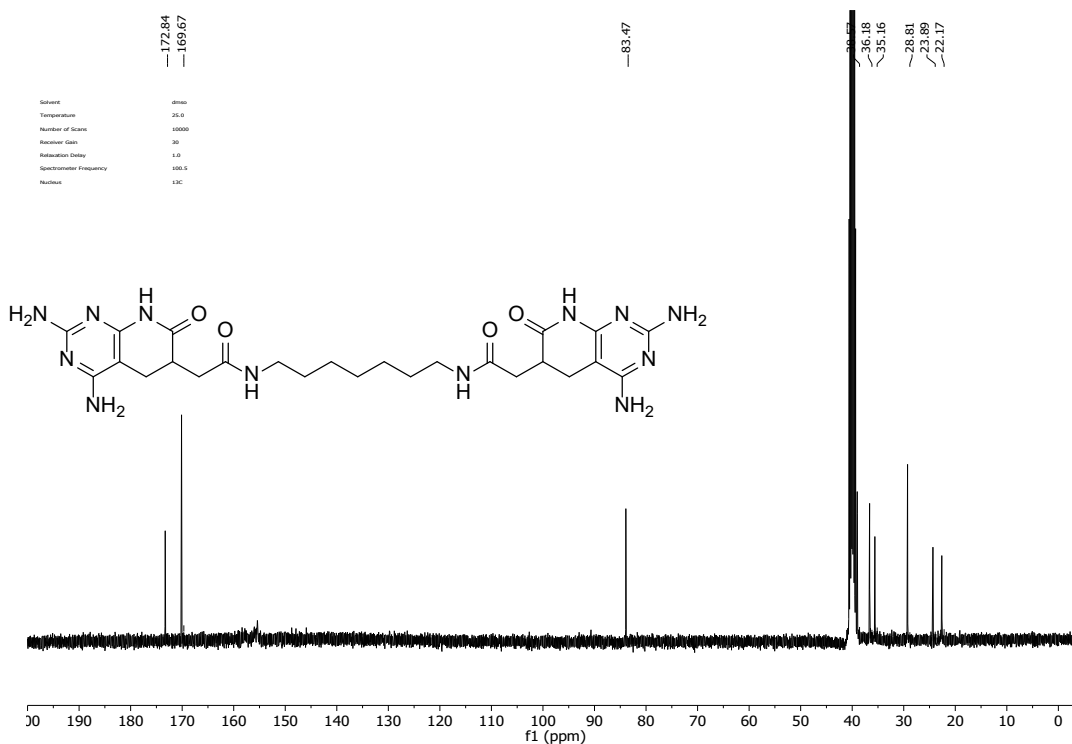

***N,N'*-(octane-1,8-diyl)bis(2-(2,4-diamino-7-oxo-5,6,7,8-tetrahydropyrido[2,3-*d*]pyrimidin-6-yl)acetamide) (1c).**

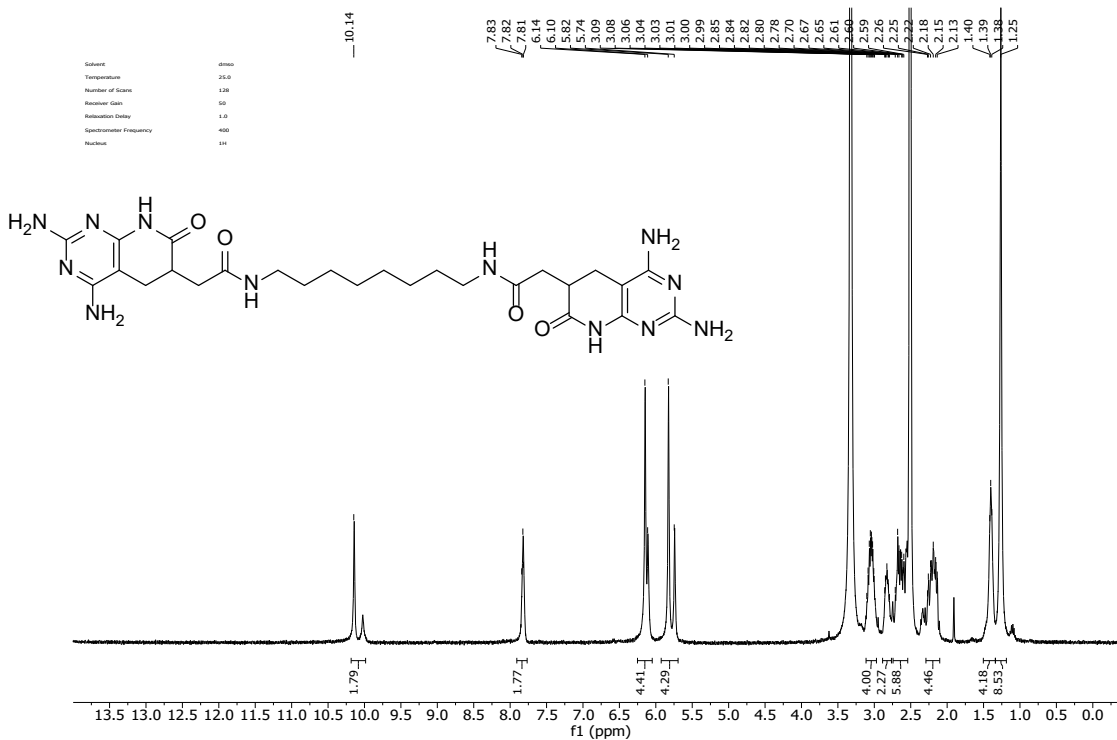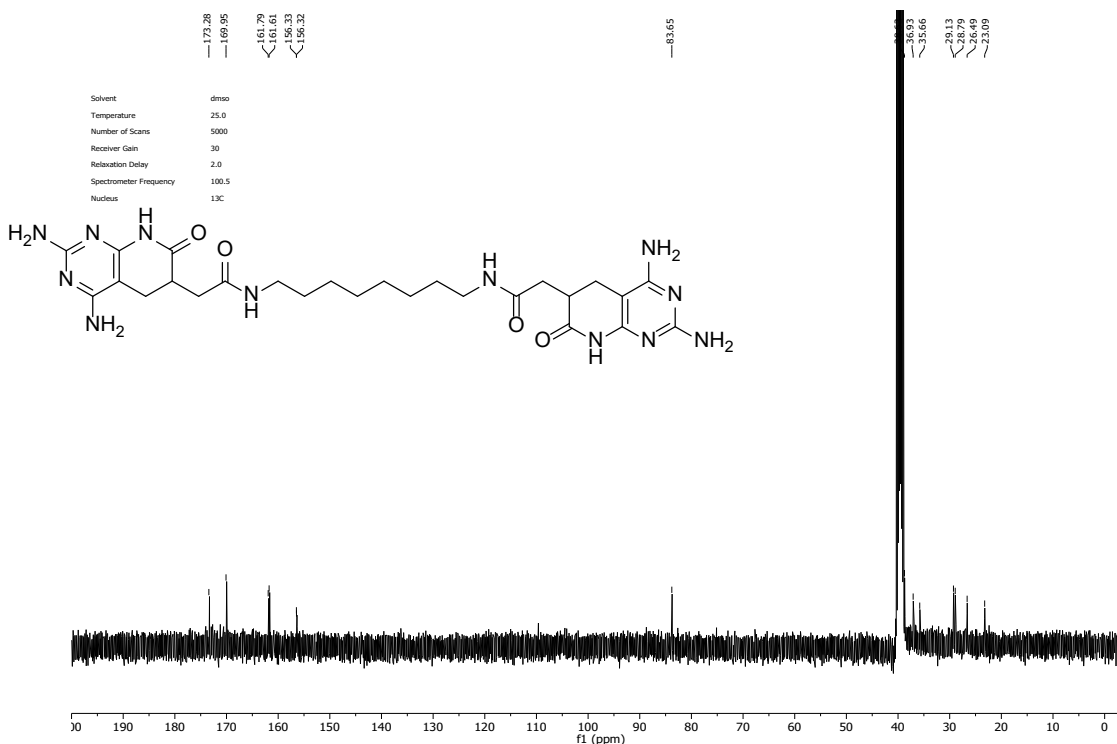

***N,N'*-(nonane-1,9-diyl)bis(2-(2,4-diamino-7-oxo-5,6,7,8-tetrahydropyrido[2,3-*d*]pyrimidin-6-yl)acetamide) (1d)**

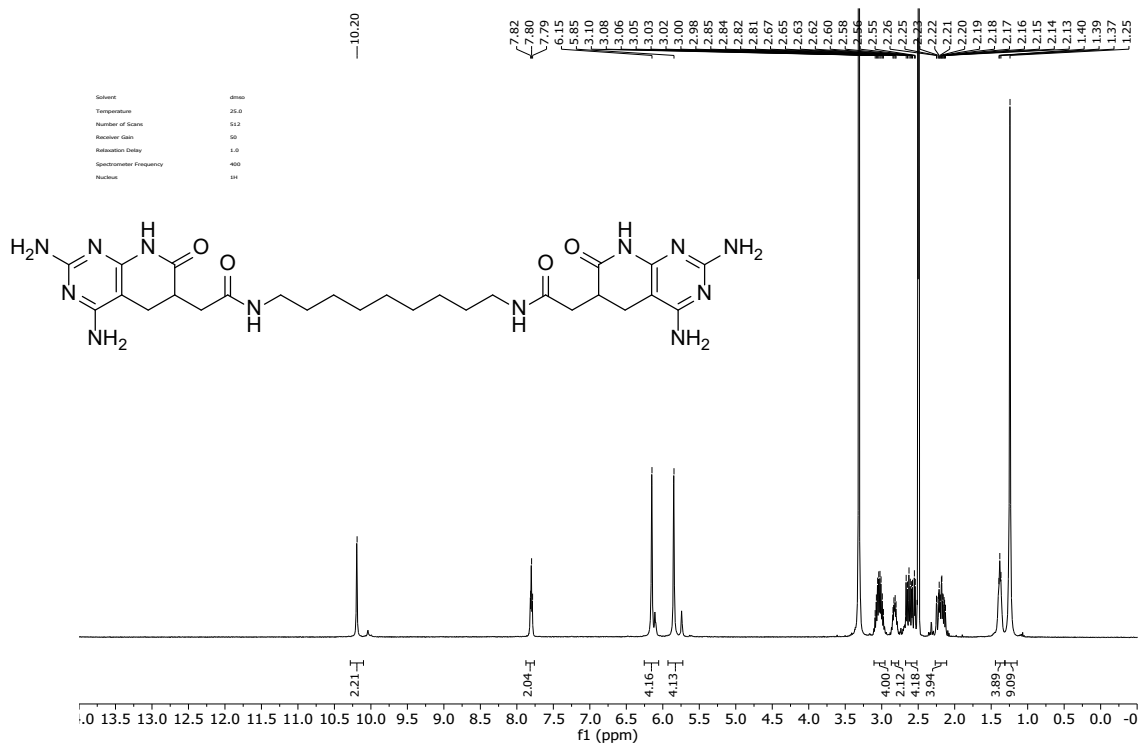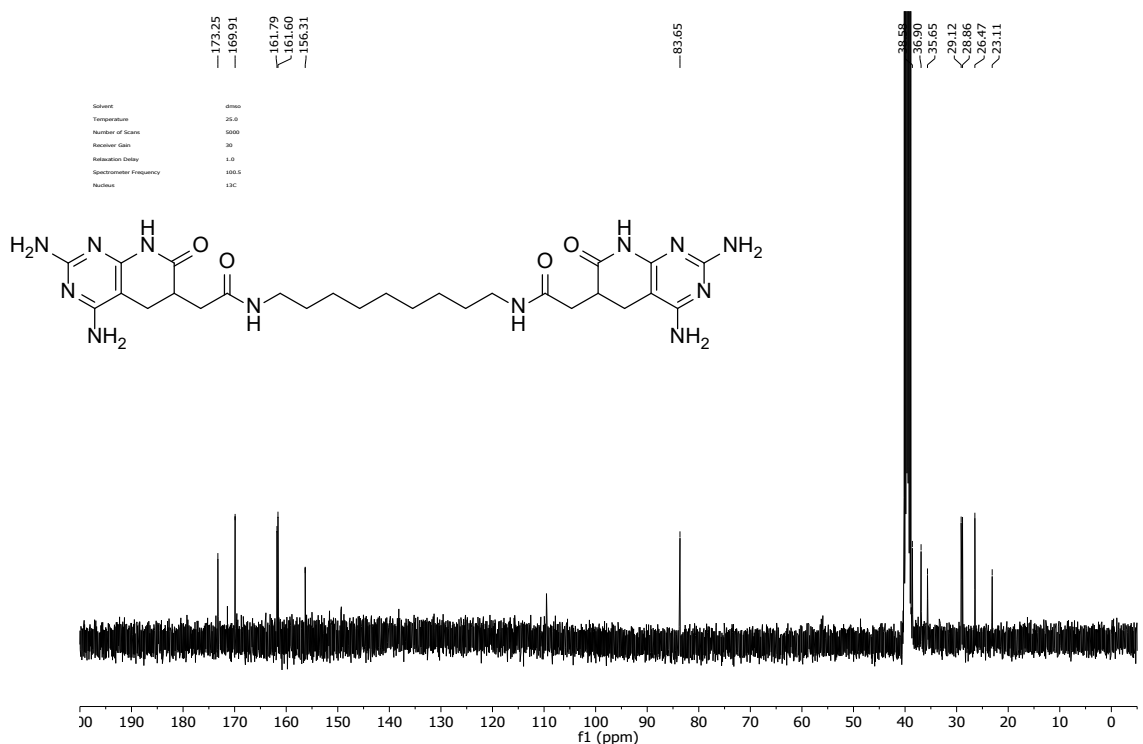

***N,N'*-(decane-1,10-diyl)bis(2-(2,4-diamino-7-oxo-5,6,7,8-tetrahydropyrido[2,3-*d*]pyrimidin-6-yl)acetamide) (1e)**

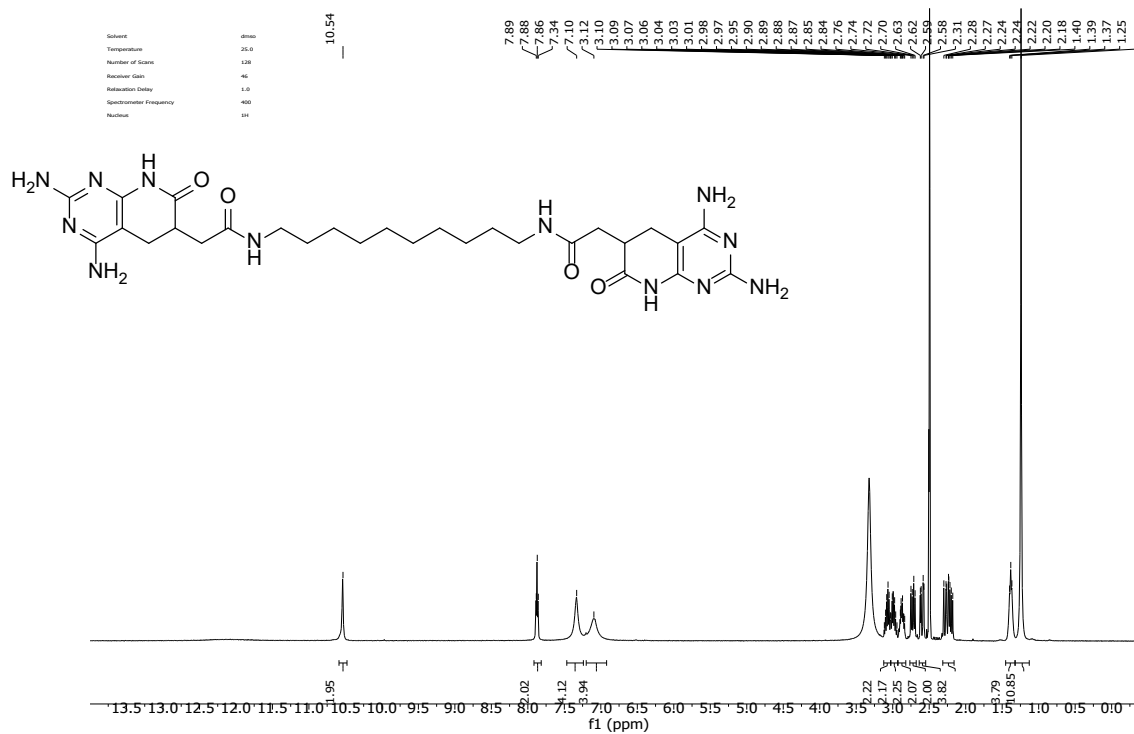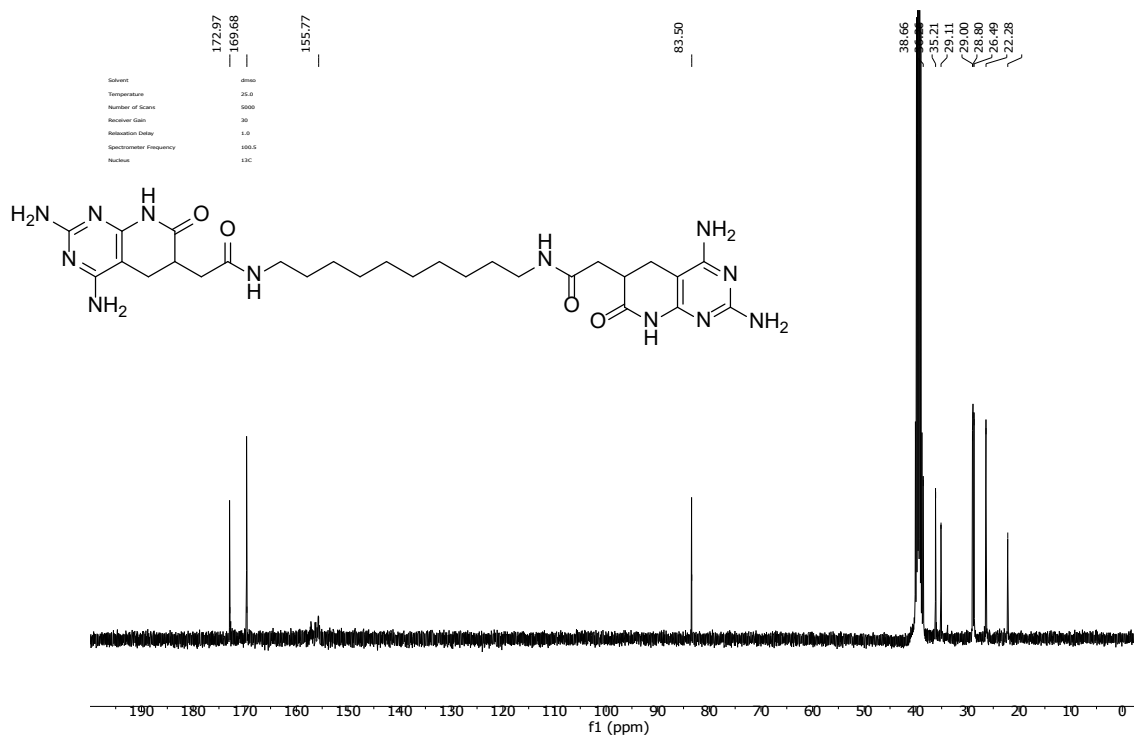



## Biochemistry

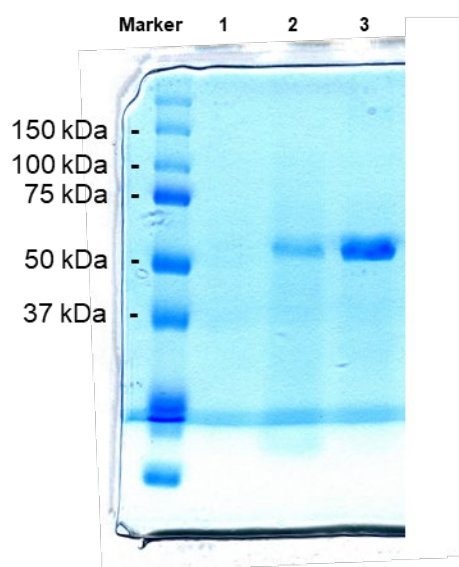

**Figure S4.** Coomassie staining of SDS-PAGE gel to verify MBNL1 purity. First lane corresponds to the marker (Precision Plus Protein Dual Color Marker), and next lanes correspond to the 3 eluate fractions collected from PD-10, being selected for the study **3**.

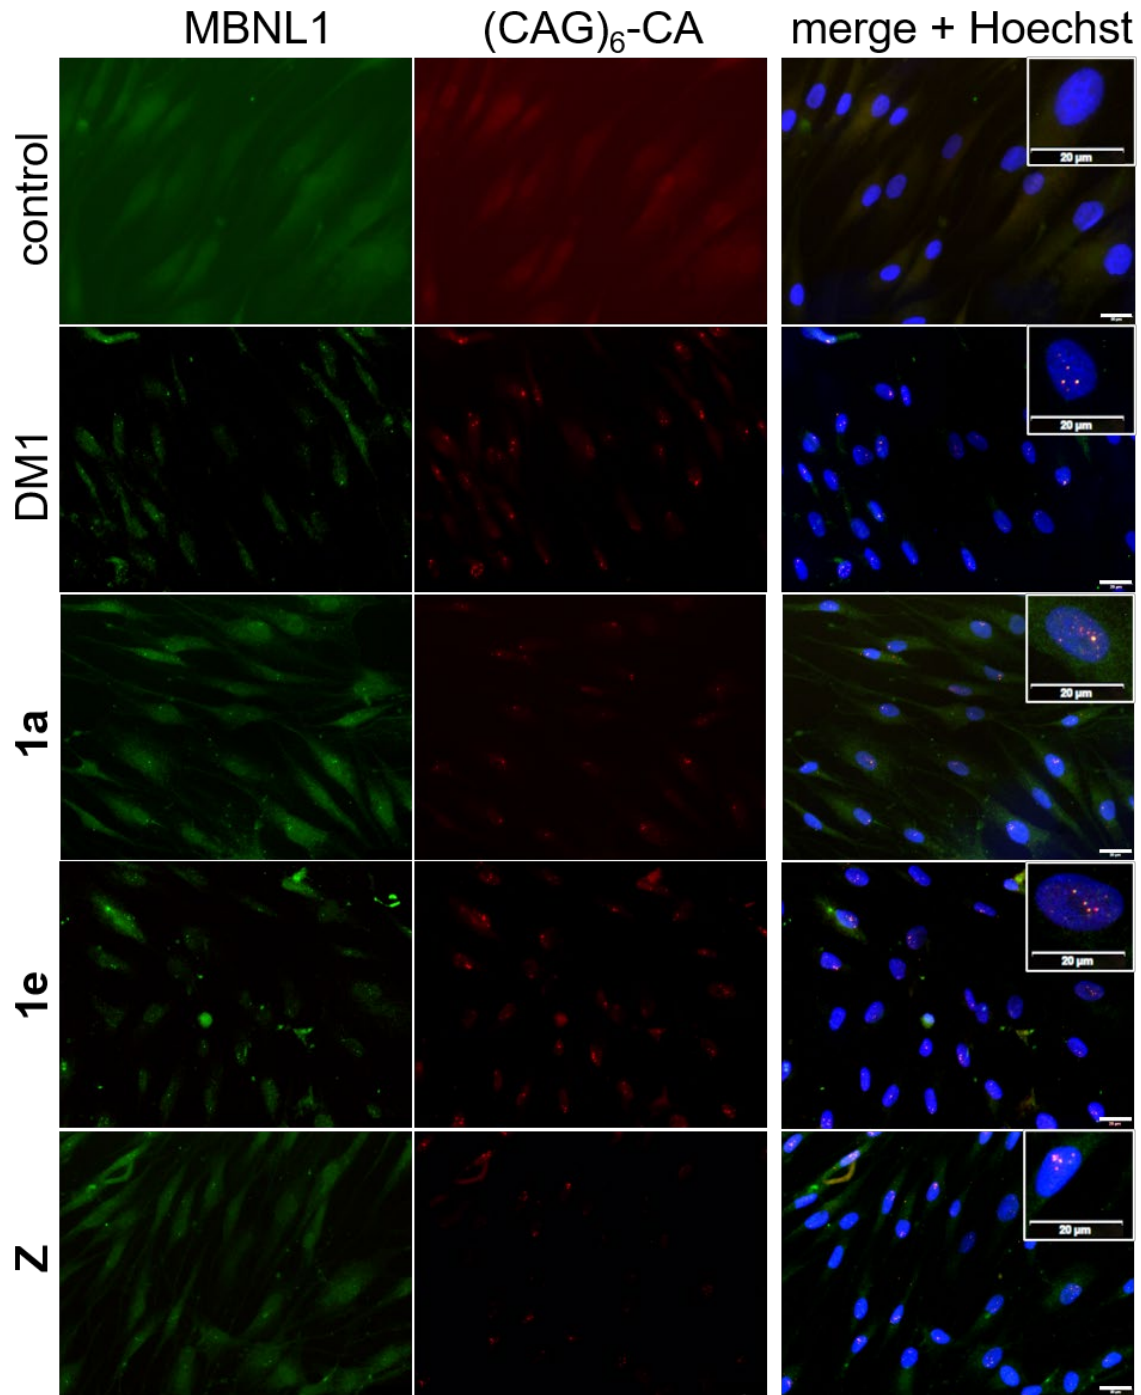

**Figure S5.** FISH using a (CAG)<sub>6</sub> probe labelled with Texas Red at the 5' end in combination with immunofluorescence staining. To verify the co-localization of MBNL1 in ribonuclear inclusions, following the last post-hybridization wash, the indicated cells were stained sequentially with antibodies to MBNL1 and with goat anti-mouse antibody conjugated with Alexa Fluor 488. Nuclei were visualized with Hoechst 33258 dye. (scale bars 20 μm).

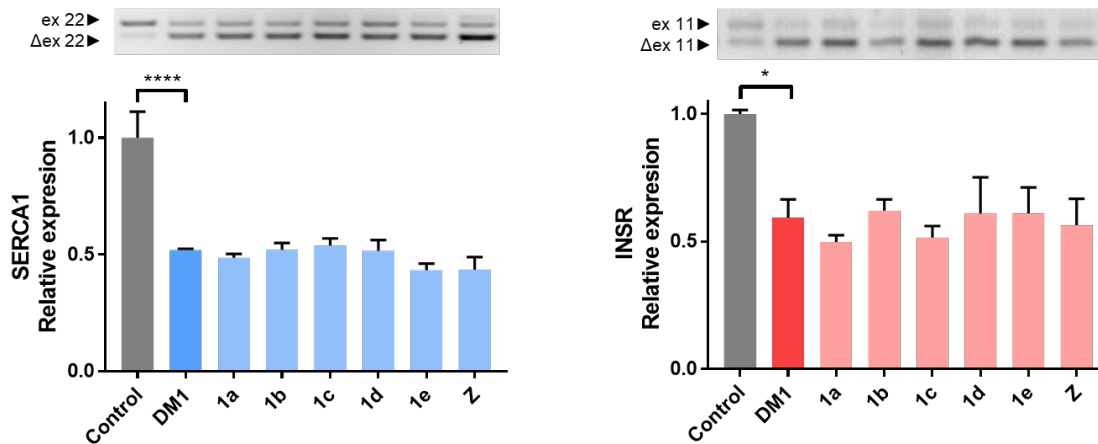

**Figure S6.** PCR study of SERCA1 and INSR alternative splicing. The results show the relative intensity of the upper band divided by the sum of intensities of both bands and normalised to control cells. All results are presented as the mean  $\pm$  SD of three experiments. P values were assessed by two-tailed t test. Strong significance was observed between control and diseased cells. On the other hand, no significance was observed between treated cells and DM1 cells. (\*\*\*\* $p < 0.0001$ , \* $p < 0.05$ ).

**Table S1.** List of primers used in PCR.

| Primers      | Forward (F)          | Reverse (R)          |
|--------------|----------------------|----------------------|
| hINSR ex11   | CCAAAGACAGACTCTCAGAT | AACATCGCCAAGGGACCTGC |
| hSERCA1 ex22 | ATCTTCAAGCTCCGGGCCCT | CAGCTCTGCCTGAAGATGTG |

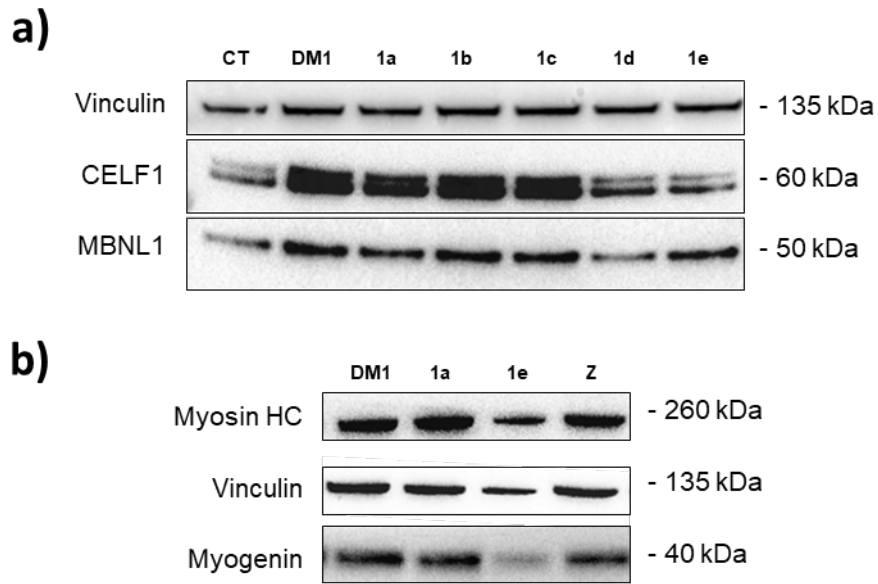

**Figure S7.** Western blot analysis of: a) CUGBP Elav-like family member 1 (CELF1), muscleblind like protein 1 (MBNL1) and constitutively expressed vinculin (Vinculin) in control, DM1 cells untreated or treated with the indicated drugs. a) muscle specific factors myogenin (Myogenin), myosin (Myosin HC) and constitutively expressed vinculin (Vinculin).

**Table S2.** List of antibodies used in both IF and WB experiments. Otherwise noticed all antibodies are obtained from mouse.

| Antibody              | Source                   | Reference |
|-----------------------|--------------------------|-----------|
| mAb anti-vinculin     | Sigma-Aldrich            | V4505     |
| mAb anti-MBNL1 (3A4)  | Santa Cruz Biotechnology | sc-47740  |
| mAb anti-CUGBP1 (3B1) | Santa Cruz Biotechnology | sc-20003  |
| mAb myosin HC (MF20)  | D. Fischman              | -         |
| mAb myogenin (F5D)    | G. Cossu                 | -         |
| GAM IgG-HRP           | Santa Cruz Biotechnology | sc-2005   |
| Alexa Fluor 488 GAM   | Invitrogen               | A32723    |
